# Supplementary material
Source: PubMed Central journal article supplement (PMC10112738)
Supplement: NIHMS1889406-supplement-1.pdf [file NIHMS1889406-supplement-1.pdf]

Table S1: primary discharge diagnoses for patients receiving ECT, based on PECCS categories, and under each category are individual *ICD-10-CM* codes contributing to that category, with codes diagnosed >10 times included for each category.

| <b>n</b> | <b>PECCS Category</b> | <b>PECCS Description</b>                                         |
|----------|-----------------------|------------------------------------------------------------------|
| 270      | 662000                | Suicide and intentional self-inflicted injury                    |
| 166      | 651000                | Anxiety disorders                                                |
| 76       | 661000                | Substance-related disorders                                      |
| 58       | 670000                | Miscellaneous mental health disorders                            |
| 55       | 255000                | Administrative/social admission                                  |
| 50       | 58000                 | Other nutritional; endocrine; and metabolic disorders            |
| 48       | 257000                | Other aftercare                                                  |
| 45       | 155004                | Constipation                                                     |
| 43       | 651001                | Posttraumatic stress disorder                                    |
| 42       | 106000                | Cardiac dysrhythmias                                             |
| 42       | 652001                | Attention-deficit hyperactivity disorder                         |
| 41       | 259001                | Sleep disturbances                                               |
| 37       | 128000                | Asthma                                                           |
| 37       | 658000                | Personality disorders                                            |
| 36       | 58004                 | Obesity                                                          |
| 34       | 651002                | Phobias                                                          |
| 34       | 655001                | Autistic disorder                                                |
| 33       | 657003                | Mood disorders (major depressive disorder)                       |
| 32       | 253000                | Allergic reactions                                               |
| 32       | 651003                | OCD                                                              |
| 31       | 52002                 | Vitamin deficiency                                               |
| 30       | 654000                | Developmental disorders                                          |
| 28       | 659000                | Schizophrenia and other psychotic disorders                      |
| 28       | 95000                 | Other nervous system disorders                                   |
| 27       | 84000                 | Headache; including migraine                                     |
| 25       | 663000                | Screening and history of mental health and substance abuse codes |
| 25       | 98000                 | Essential hypertension                                           |
| 20       | 138002                | Gastroesophageal reflux and esophagitis                          |
| 19       | 163000                | Genitourinary symptoms and ill-defined conditions                |
| 19       | 655000                | Disorders usually diagnosed in infancy childhood or adolescence  |
| 18       | 117000                | Other circulatory disease                                        |
| 17       | 134001                | Allergic rhinitis                                                |
| 17       | 233000                | Intracranial injury                                              |
| 16       | 48000                 | Thyroid disorders                                                |
| 14       | 250000                | Nausea and vomiting                                              |
| 14       | 657002                | Mood disorders (bipolar disorder)                                |
| 13       | 656000                | Impulse control disorders NEC                                    |
| 13       | 657000                | Mood disorders                                                   |
| 12       | 200000                | Other skin disorders                                             |
| 12       | 205000                | Spondylosis; intervertebral disc disorders; other back problems  |

|    |        |                                                    |
|----|--------|----------------------------------------------------|
| 12 | 2621   | External cause codes: place of occurrence          |
| 11 | 10000  | Immunizations and screening for infectious disease |
| 11 | 211000 | Other connective tissue disease                    |
| 11 | 231000 | Other fractures                                    |
| 11 | 236000 | Open wounds of extremities                         |
| 11 | 2617   | Adverse effects of medical drugs                   |
| 11 | 55001  | Dehydration                                        |

Table S2: PECCS categories for the secondary discharge diagnoses for patients receiving ECT.

Included are all categories diagnosed >10 times.

| <b>Code</b>                  | <b>n</b> | <b>%</b> | <b>Diagnosis</b>                                           | <b>PECCS Category</b>                                 |
|------------------------------|----------|----------|------------------------------------------------------------|-------------------------------------------------------|
| <b>Psychiatric Diagnoses</b> |          |          |                                                            |                                                       |
| <b>R45851</b>                | 153      | 48.6     | Suicidal ideations                                         | Suicide and intentional self-inflicted injury         |
| <b>Z915</b>                  | 83       | 26.3     | Personal history of self-harm                              | Suicide and intentional self-inflicted injury         |
| <b>Z818</b>                  | 78       | 24.8     | Family history of other mental and behavioral disorders    | Residual codes; unclassified                          |
| <b>F419</b>                  | 77       | 24.4     | Anxiety disorder, unspecified                              | Anxiety disorders                                     |
| <b>F411</b>                  | 51       | 16.2     | Generalized anxiety disorder                               | Anxiety disorders                                     |
| <b>F4310</b>                 | 40       | 12.7     | Post-traumatic stress disorder, unspecified                | Posttraumatic stress disorder                         |
| <b>G4700</b>                 | 39       | 12.4     | Insomnia, unspecified                                      | Sleep disturbances                                    |
| <b>F840</b>                  | 34       | 10.8     | Autistic disorder                                          | Autistic disorder                                     |
| <b>F4010</b>                 | 32       | 10.2     | Social phobia, unspecified                                 | Phobias                                               |
| <b>F429</b>                  | 32       | 10.2     | Obsessive-compulsive disorder, unspecified                 | OCD                                                   |
| <b>F603</b>                  | 32       | 10.2     | Borderline personality disorder                            | Personality disorders                                 |
| <b>Z781</b>                  | 31       | 9.8      | Physical restraint status                                  | Residual codes; unclassified                          |
| <b>F909</b>                  | 30       | 9.5      | Attention-deficit hyperactivity disorder, unspecified type | Attention-deficit hyperactivity disorder              |
| <b>F061</b>                  | 27       | 8.6      | Catatonic disorder due to known physiological condition    | Miscellaneous mental health disorders                 |
| <b>F1290</b>                 | 20       | 6.3      | Cannabis use, unspecified, uncomplicated                   | Substance-related disorders                           |
| <b>F410</b>                  | 19       | 6.0      | Panic disorder [episodic paroxysmal anxiety]               | Anxiety disorders                                     |
| <b>F1210</b>                 | 18       | 5.7      | Cannabis abuse, uncomplicated                              | Substance-related disorders                           |
| <b>F329</b>                  | 16       | 5.1      | Major depressive disorder, single episode, unspecified     | Mood disorders (major depressive disorder)            |
| <b>F509</b>                  | 12       | 3.8      | Eating disorder, unspecified                               | Miscellaneous mental health disorders                 |
| <b>R451</b>                  | 11       | 3.5      | Restlessness and agitation                                 | Residual codes; unclassified                          |
| <b>Medical Diagnoses</b>     |          |          |                                                            |                                                       |
| <b>K5900</b>                 | 40       | 12.7     | Constipation, unspecified                                  | Constipation                                          |
| <b>Z79899</b>                | 36       | 11.4     | Other long term (current) drug therapy                     | Other aftercare                                       |
| <b>R000</b>                  | 33       | 10.5     | Tachycardia, unspecified                                   | Cardiac dysrhythmias                                  |
| <b>E559</b>                  | 29       | 9.2      | Vitamin D deficiency, unspecified                          | Vitamin deficiency                                    |
| <b>J45909</b>                | 28       | 8.9      | Unspecified asthma, uncomplicated                          | Asthma                                                |
| <b>I10</b>                   | 25       | 7.9      | Essential (primary) hypertension                           | Essential hypertension                                |
| <b>E669</b>                  | 22       | 7.0      | Obesity, unspecified                                       | Obesity                                               |
| <b>K219</b>                  | 19       | 6.0      | Gastro-esophageal reflux disease without esophagitis       | Gastroesophageal reflux and esophagitis               |
| <b>R51</b>                   | 15       | 4.8      | Headache                                                   | Headache; including migraine                          |
| <b>Z6854</b>                 | 14       | 4.4      | BMI pediatric, greater than or equal to 95% for age        | Other nutritional; endocrine; and metabolic disorders |

|               |    |     |                                                       |                              |
|---------------|----|-----|-------------------------------------------------------|------------------------------|
| <b>Z87820</b> | 14 | 4.4 | Personal history of traumatic brain injury            | Intracranial injury          |
| <b>Z9114</b>  | 13 | 4.1 | Patient's other noncompliance with medication regimen | Residual codes; unclassified |
| <b>J302</b>   | 12 | 3.8 | Other seasonal allergic rhinitis                      | Allergic rhinitis            |

Table S3: secondary *ICD-10-CM* discharge diagnoses for hospitalizations involving ECT.

Diagnostic codes listed in descending order of frequency, along with the associated CCSR code and category for each *ICD-10-CM* code, and are separated by psychiatric vs. medical diagnoses.
