# Supplementary material
Source: PubMed Central journal article supplement (PMC10112738)
Supplement: NIHMS1889406-supplement-2.pdf [file NIHMS1889406-supplement-2.pdf]

| Category/Code                 | n          | %           | Description                                                  |
|-------------------------------|------------|-------------|--------------------------------------------------------------|
| <b>657003</b>                 | <b>143</b> | <b>46.4</b> | <b>Major depressive disorder</b>                             |
| F332                          | 85         | 26.9        | Major depressv disorder, recurrent severe w/o psych features |
| F333                          | 21         | 6.7         | Major depressv disorder, recurrent, severe w psych symptoms  |
| F322                          | 12         | 3.8         | Major depressv disord, single epsd, sev w/o psych features   |
| F329                          | 12         | 3.8         | Major depressive disorder, single episode, unspecified       |
| <b>659000</b>                 | <b>71</b>  | <b>23.1</b> | <b>Schizophrenia and other psychotic disorders</b>           |
| F202                          | 19         | 6           | Catatonic schizophrenia                                      |
| F29                           | 16         | 5.2         | Unsp psychosis not due to a substance or known physiol cond  |
| F250                          | 14         | 4.6         | Schizoaffective disorder, bipolar type                       |
| <b>657002</b>                 | <b>59</b>  | <b>19.2</b> | <b>Bipolar disorder</b>                                      |
| F319                          | 13         | 4.2         | Bipolar disorder, unspecified                                |
| <b>Other PECCS categories</b> | <b>35</b>  | <b>11.1</b> | <b>Various</b>                                               |

Table S1: primary discharge diagnoses for patients receiving ECT, based on PECCS categories, and under each category are individual *ICD-10-CM* codes contributing to that category, with codes diagnosed >10 times included for each category.
